# Supplementary material
Source: PubMed Central journal article supplement (PMC6615735)
Supplement: NIHMS1532372-supplement-1.pdf [file NIHMS1532372-supplement-1.pdf]

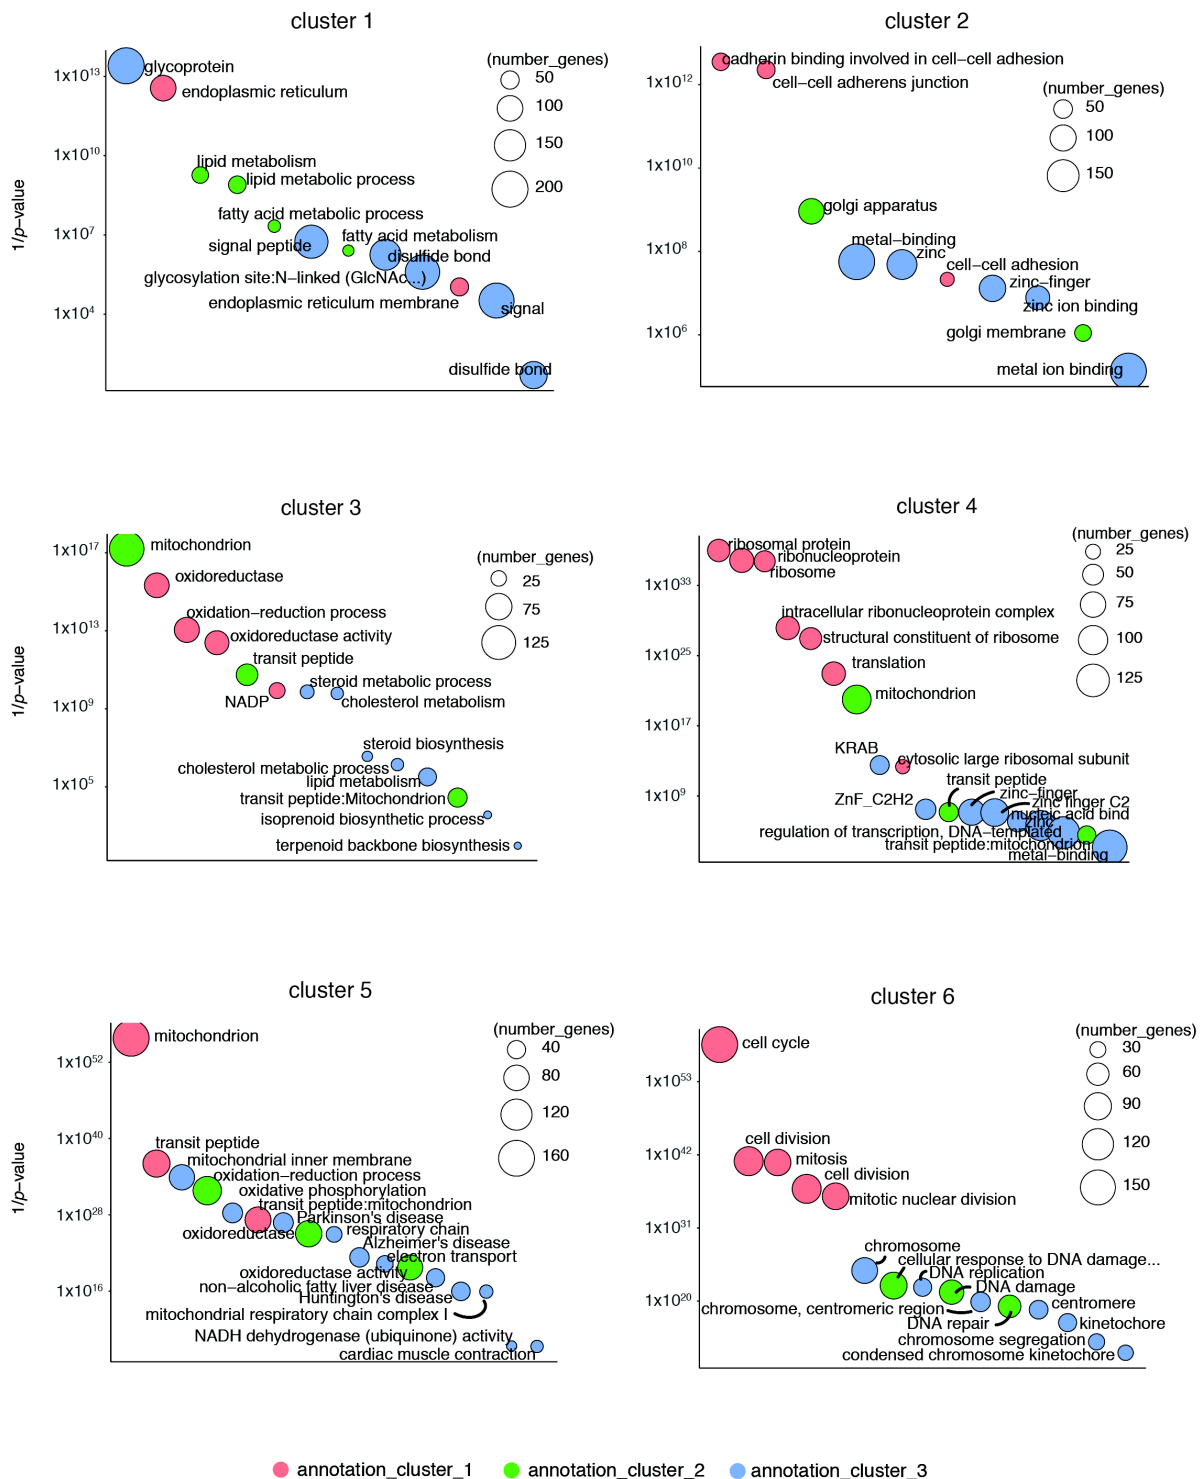

**Figure S1. Related to Figure 1.** GO DAVID analysis of WT liver regeneration gene clusters identified by unsupervised clustering from Figure 1C. Circles represent gene ontology categories that are most significantly enriched with y-axis being  $1/P$ -value and size of circle proportional to number of genes in each category. Red, green, and blue depict the first, second, and third ranked GO DAVID annotation cluster by enrichment score, respectively.

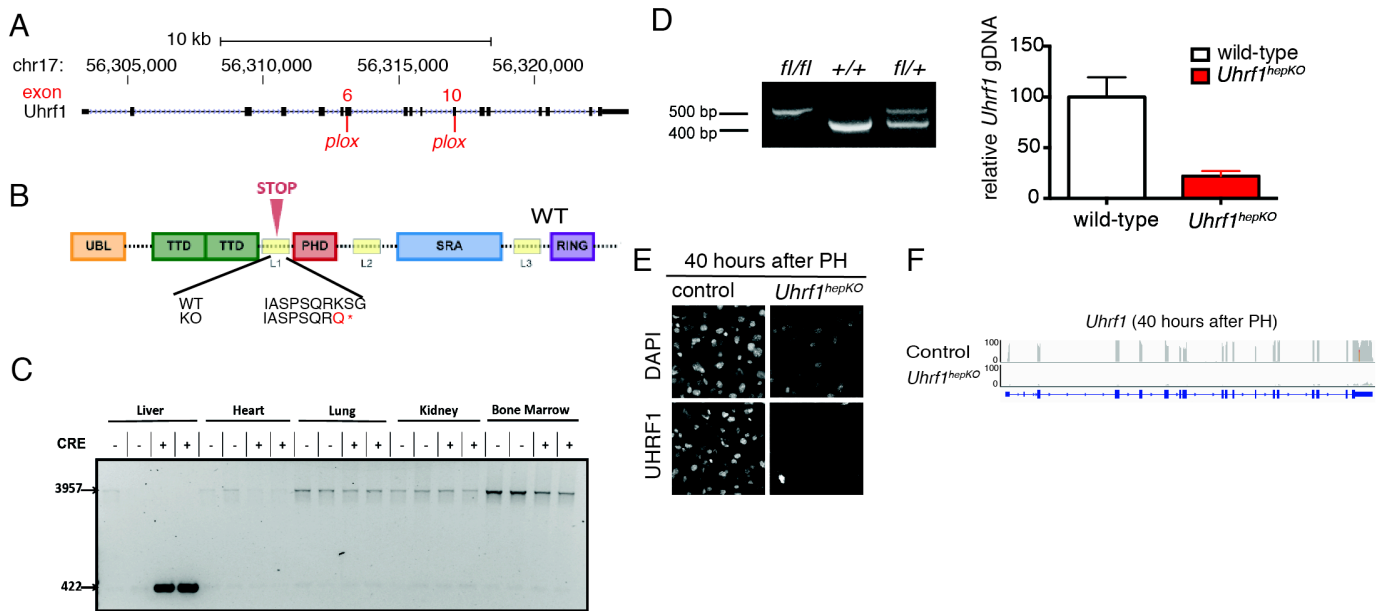

**Figure S2. Related to Figure 2.** (A) Cartoon illustration depicting where the flox sites are engineered within the *Uhrf1* gene locus. (B) Cartoon illustration depicting where the stop codon is engineered with respect to known domains in the UHRF1 protein in *Uhrf1<sup>hepKO</sup>* mice. (C) PCR amplification of the *Cre* transgene gDNA isolated from various tissues of *Uhrf1<sup>hepKO</sup>* mice (primer sequences found in supplementary table) with the 422 bp amplicon indicates presence of the *Cre* transgene and the 3957 bp amplicon corresponding to the wild-type allele. (D) PCR amplification of *Uhrf1* floxed or the corresponding WT alleles from gDNA isolated from whole liver tissue of homozygous floxed (*Uhrf1<sup>fl/fl</sup>*), heterozygous floxed (*Uhrf1<sup>fl/+</sup>*), or WT (*Uhrf1<sup>+/+</sup>*) mice. (E) UHRF1 protein detected by immunofluorescence in WT or *Uhrf1<sup>hepKO</sup>* mouse liver cryosections at 36 hours post-PH (N=1). (F) Expression of *Uhrf1* in the liver of WT or *Uhrf1<sup>hepKO</sup>* mouse at 40 hours post-PH (time-point of maximum *Uhrf1* detection in regenerating liver of WT mice) detected by RNAseq as displayed on UCSC genome browser (N=1). Error bars represent s.d.

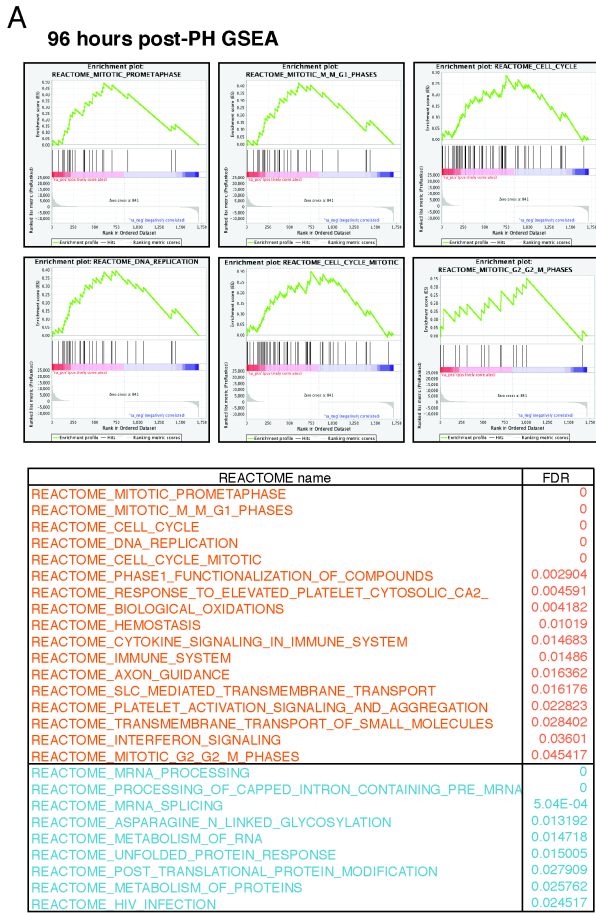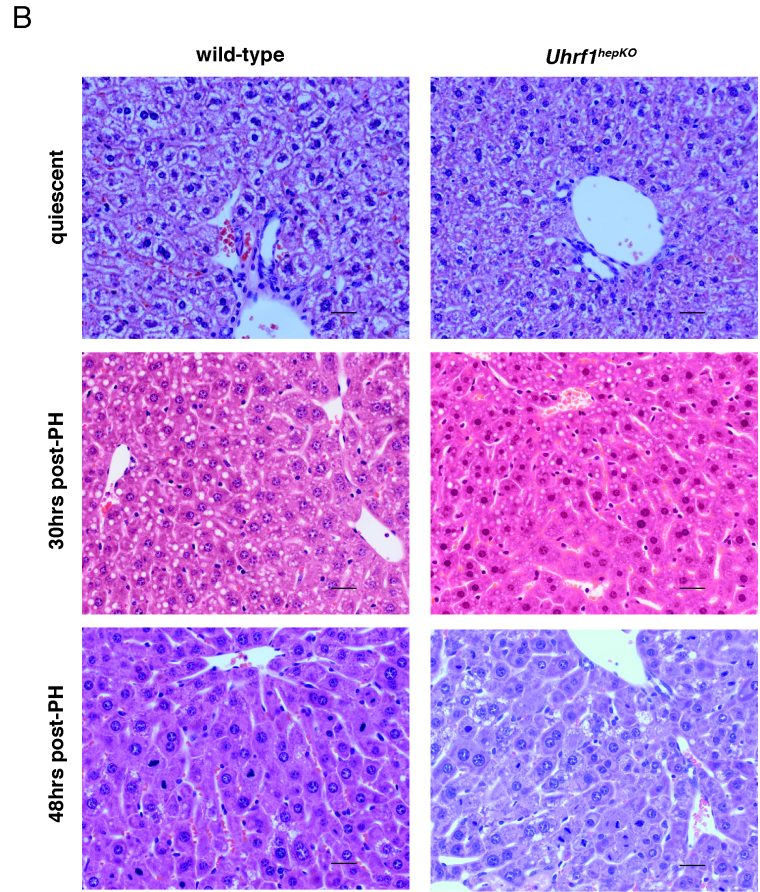

**Figure S3. Related to Figure 5.** (A) GSEA of differentially expressed genes at 96 hours post-PH showing most enriched pathways. (B) Representative hematoxylin and eosin staining of control and *Uhrf1<sup>hepKO</sup>* livers during regeneration taken at 400X magnification.

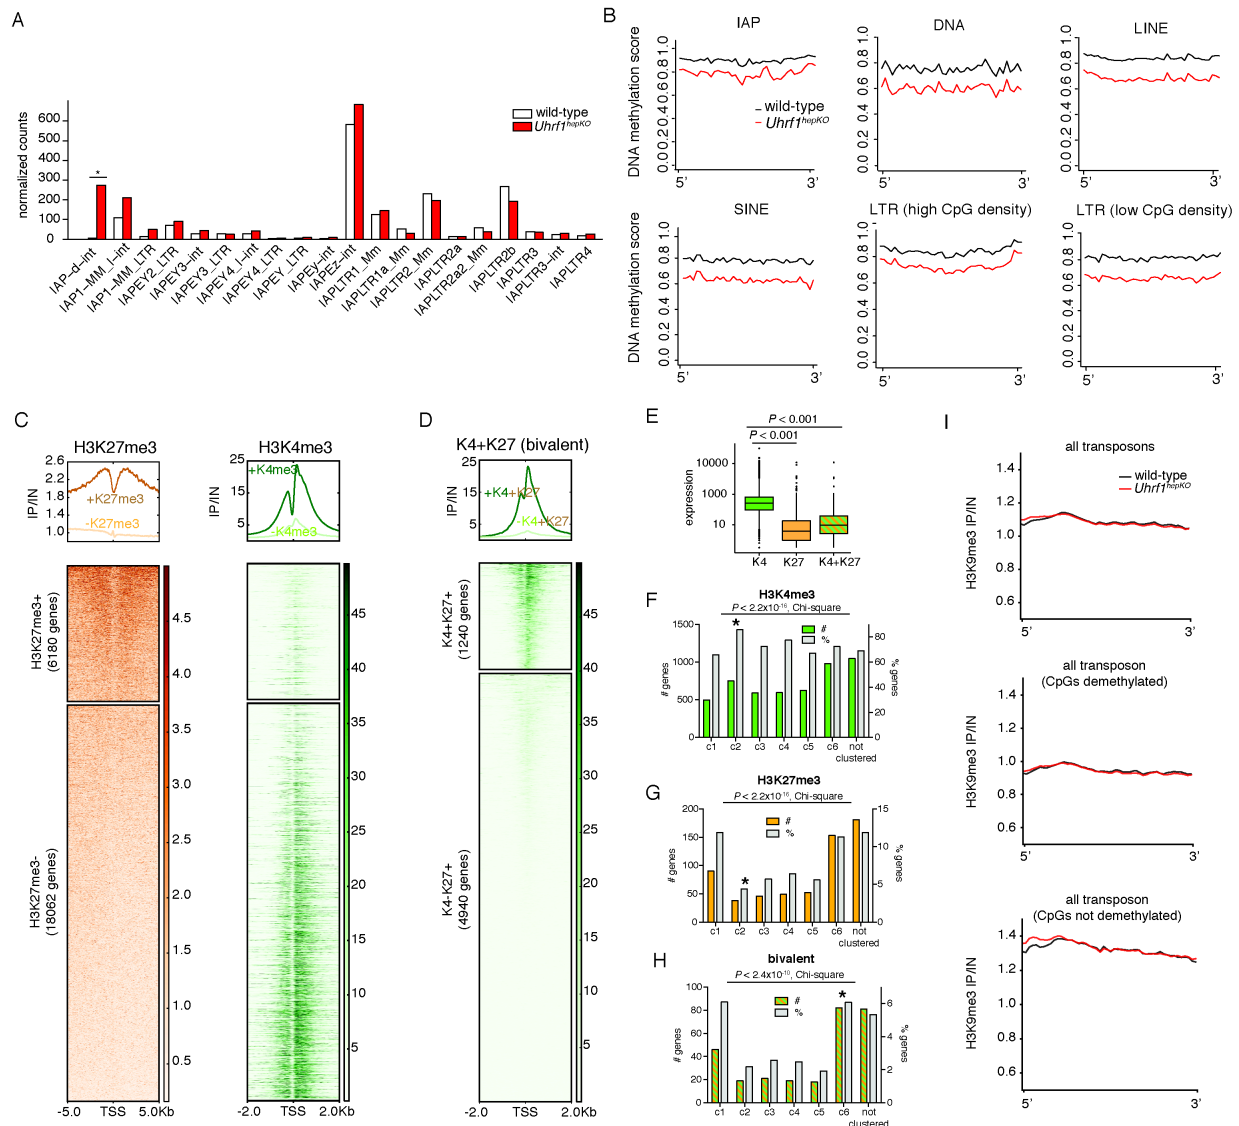

**Figure S4. Related to Figure 6.** (A) Comparing expression of 20 subfamilies of IAPs between wild-type and *Uhrf1<sup>hepKO</sup>* quiescent livers, “\*” denote significantly different between WT and KO. (B) K-means clustering of H3K27me3 ChIP-seq enrichment scores for all gene promoters into 2 groups (“H3K27me3+” and “H3K27me3-”) and the corresponding H3K3me3 ChIP-seq enrichment scores plotted as heatmaps and averages. (C) K-means clustering of “H3K27me3+” promoters from A into 2 groups (“K4+ K27+” and “K4- K27+”) according to H3K4me3 ChIP-seq enrichment scores. (D) Expression of genes marked by H3K4me3, H3K27me3, or both in the baseline liver. \*\*\*  $P < 0.001$  compared to the “H3K4me3” group by one-way ANOVA followed by Turkey’s multiple comparison test. Number of genes from each gene cluster (identified in Fig. 1D) that have promoters marked with H3K4me3 (E,  $P < 2.2 \times 10^{-16}$ , Chi-squared), H3K27me3 (F,  $P < 2.2 \times 10^{-16}$ , Chi-squared), or both (G,  $P < 2.2 \times 10^{-16}$ , Chi-square with \* depicting the group that contributed the most to significance by residual calculations). (H) Average DNA methylation enrichment profiles for control and *Uhrf1<sup>hepKO</sup>* mouse livers at eRRBS mapped IAP, DNA, LINE, SINE, high and low CpG density LTR family of TEs. (I) Average H3K9me3 ChIP-seq enrichment profiles for control and *Uhrf1<sup>hepKO</sup>* mouse livers at all eRRBS mapped TEs, those with demethylated CpGs, and those with no change in CpGs.

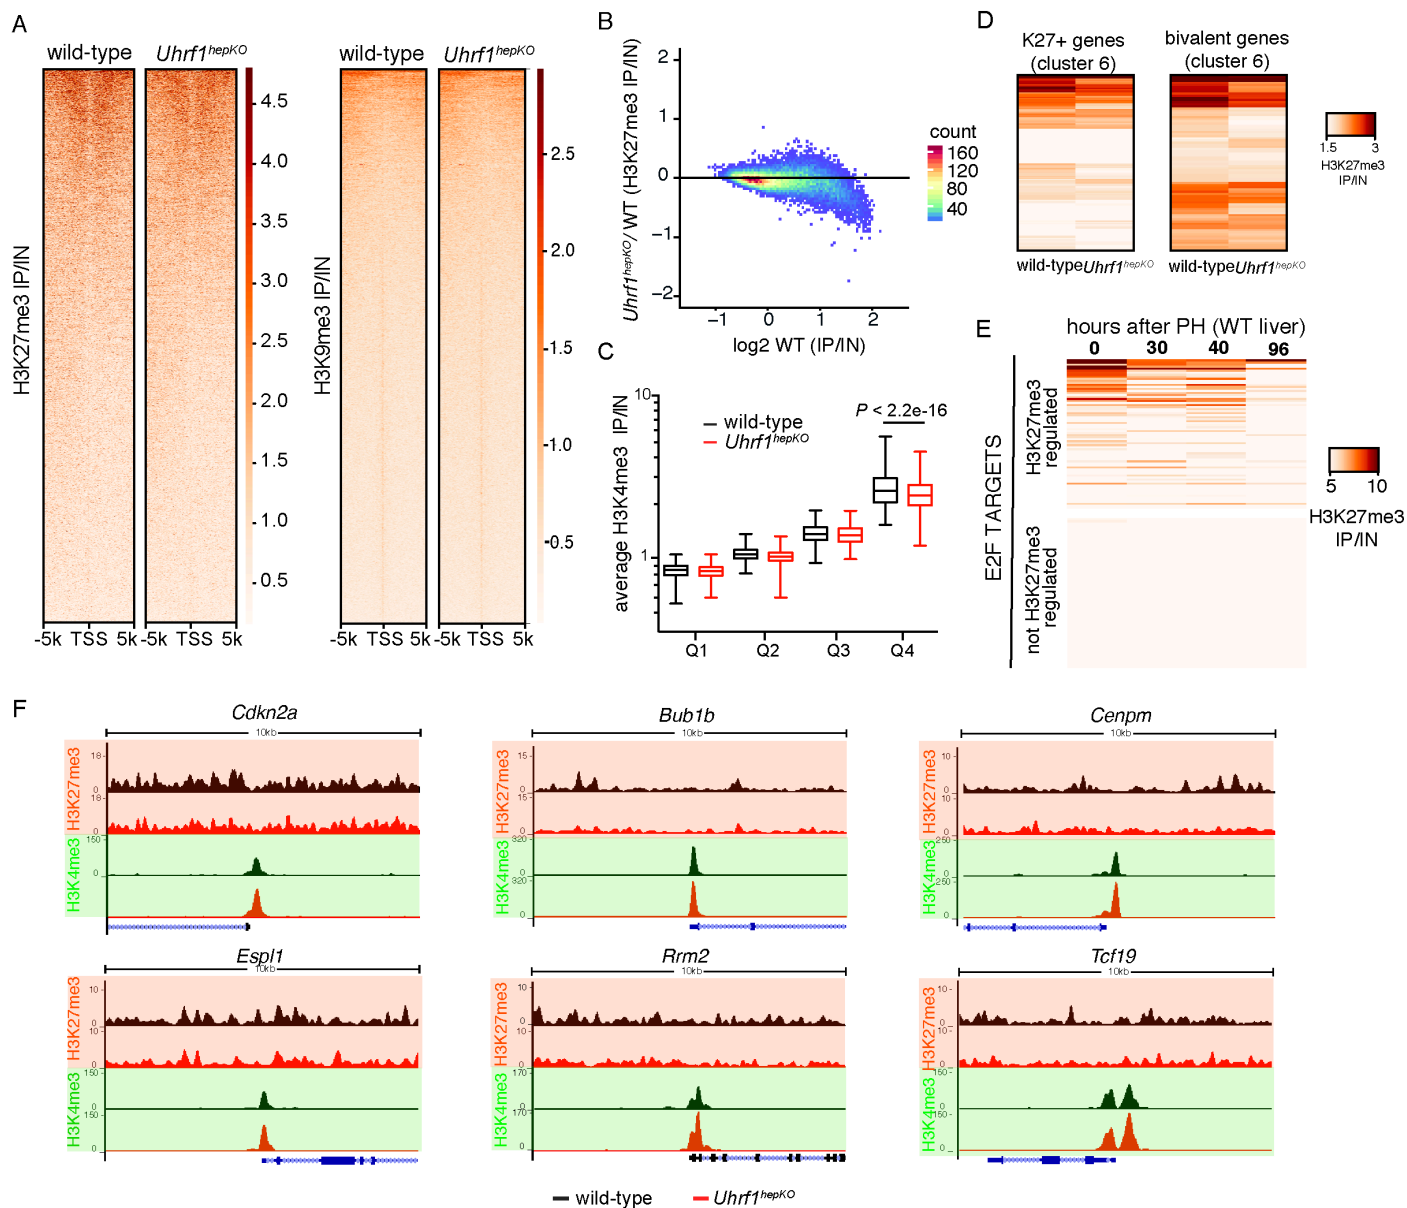

**Figure S5. Related to Figure 7.** (A) Heatmap showing a global decrease in H3K27me3 IP/IN signal in promoter of all genes but no change in H3K9me3. (B) H3K27me3 IP/IN signal for all promoters shown as scatter plot. (C) H3K27me3 IP/IN signal for all promoters broke down into quartiles and displayed as box-and-whisker plots. Error bars represent s.d. (D) Heatmap showing overall loss H3K27me3 IP/IN signal from 153 K27+ cluster 6 genes. (E) Heatmap showing overall loss H3K27me3 IP/IN signal from 82 K4+K27+ (bivalent) cluster 6 genes. (F) UCSC genome browser screenshots of 6 H3K27me3-regulated E2F targets from (E) that lost H3K27me3 and gained H3K4me3 in the promoter region in *Uhrf1<sup>hepKO</sup>* livers.
